# Supplementary material for: Differential Serum Proteomic Signatures between Acute Aortic Dissection and Acute Myocardial Infarction
Source: MDPI journal article supplement (doi:10.3390/biomedicines11010161), 2023-01-08
Supplement: s1 [file s1]

**Supplementary Table S1. LC/MS/MS identification of differential expressed proteins in *Homo Sapiens* for AAD vs **AMI** (Fold Change  $\geq 2.0$  or  $\leq -2.0$ )**

| Protein-ID | Protein Name                                               | Intensity<br><b>AMI</b> | Intensity<br>AAD | AAD vs CAD |
|------------|------------------------------------------------------------|-------------------------|------------------|------------|
| P02144     | Myoglobin                                                  | 688397.4                | 16467905         | 23.92      |
| P26038     | Moesin                                                     | 38710.67                | 781306.9         | 20.18      |
| P01817     | Immunoglobulin heavy variable 2-5                          | 725759.8                | 8540282          | 11.77      |
| Q01995     | Transgelin                                                 | 31565.22                | 334020           | 10.58      |
| Q9NQ79     | Cartilage acidic protein 1                                 | 630022.1                | 6366481          | 10.11      |
| P07451     | Carbonic anhydrase 3                                       | 327022                  | 2952756          | 9.03       |
| P55056     | Apolipoprotein C-IV                                        | 813703.3                | 7096052          | 8.72       |
| P01764     | Immunoglobulin heavy variable 3-23                         | 848560.6                | 4920354          | 5.8        |
| P33151     | Cadherin-5                                                 | 989881.1                | 5473888          | 5.53       |
| P23083     | Immunoglobulin heavy variable 1-2                          | 831486.3                | 4258844          | 5.12       |
| P11021     | Endoplasmic reticulum chaperone BiP                        | 489251.7                | 2326385          | 4.75       |
| P55058     | Phospholipid transfer protein                              | 749504.2                | 3546692          | 4.73       |
| P05154     | Plasma serine protease inhibitor                           | 520705.2                | 2275669          | 4.37       |
| Q9NTU7     | Cerebellin-4                                               | 118239.9                | 515919.8         | 4.36       |
| P02786     | Transferrin receptor protein 1                             | 547354.9                | 2336864          | 4.27       |
| P80748     | Immunoglobulin lambda variable 3-21                        | 278021.3                | 1176171          | 4.23       |
| P29622     | Kallistatin                                                | 17151421                | 70888052         | 4.13       |
| P01833     | Polymeric immunoglobulin receptor                          | 7376291                 | 30080537         | 4.08       |
| P06727     | Apolipoprotein A-IV                                        | 6.34E+08                | 2.45E+09         | 3.86       |
| P35030     | Trypsin-3                                                  | 426502.4                | 1612806          | 3.78       |
| P04430     | Immunoglobulin kappa variable 1-16                         | 1325133                 | 4971265          | 3.75       |
| P07996     | Thrombospondin-1                                           | 19853735                | 70848913         | 3.57       |
| P20851     | C4b-binding protein beta chain                             | 6527605                 | 22846242         | 3.5        |
| P01602     | Immunoglobulin kappa variable 1-5                          | 2257924                 | 7658749          | 3.39       |
| P02649     | Apolipoprotein E                                           | 1.73E+08                | 5.8E+08          | 3.36       |
| Q9UHG3     | Prenylcysteine oxidase 1                                   | 973961.3                | 3274979          | 3.36       |
| P01594     | Immunoglobulin kappa variable 1-33                         | 676009.7                | 2199658          | 3.25       |
| P25705     | ATP synthase subunit alpha, mitochondrial                  | 125488                  | 397614.8         | 3.17       |
| P07359     | Platelet glycoprotein Ib alpha chain                       | 1513771                 | 4748382          | 3.14       |
| P03952     | Plasma kallikrein                                          | 36467427                | 1.1E+08          | 3.01       |
| P19320     | Vascular cell adhesion protein 1                           | 486549.1                | 1412516          | 2.9        |
| A0A0J9YX35 | Immunoglobulin heavy variable 3-64D                        | 4239158                 | 12153428         | 2.87       |
| P06396     | Gelsolin                                                   | 1.49E+08                | 4.18E+08         | 2.8        |
| P02766     | Transthyretin                                              | 2.63E+08                | 7.28E+08         | 2.77       |
| P08582     | Melanotransferrin                                          | 822883.6                | 2252613          | 2.74       |
| A0A0C4DH67 | Immunoglobulin kappa variable 1-8                          | 2534803                 | 6853676          | 2.7        |
| P08603     | Complement factor H                                        | 2.16E+08                | 5.69E+08         | 2.64       |
| A0A0C4DH73 | Immunoglobulin kappa variable 1-12                         | 263538.7                | 689624.1         | 2.62       |
| P14151     | L-selectin                                                 | 2932724                 | 7630780          | 2.6        |
| Q13201     | Multimerin-1                                               | 771145                  | 1973833          | 2.56       |
| A0A075B6S5 | Immunoglobulin kappa variable 1-27                         | 1803679                 | 4527945          | 2.51       |
| Q96IY4     | Carboxypeptidase B2                                        | 4425868                 | 10882839         | 2.46       |
| Q04756     | Hepatocyte growth factor activator                         | 11416057                | 27792960         | 2.43       |
| P0DOX4     | Immunoglobulin epsilon heavy chain                         | 2870988                 | 6963363          | 2.43       |
| P19338     | Nucleolin                                                  | 248706.6                | 604716.4         | 2.43       |
| Q96PD5     | N-acetylmuramoyl-L-alanine amidase                         | 75785136                | 1.81E+08         | 2.39       |
| P62244     | 40S ribosomal protein S15a                                 | 211678.6                | 498223.3         | 2.35       |
| A0A0C4DH35 | Probable non-functional immunoglobulin heavy variable 3-35 | 6143242                 | 14332570         | 2.33       |
| P49747     | Cartilage oligomeric matrix protein                        | 1611038                 | 3421079          | 2.12       |
| P01859     | Immunoglobulin heavy constant gamma 2                      | 1.18E+08                | 2.47E+08         | 2.08       |
| P69891     | Hemoglobin subunit gamma-1                                 | 3515395                 | 7302973          | 2.08       |
| P02042     | Hemoglobin subunit delta                                   | 48487786                | 1E+08            | 2.07       |
| Q5BKX8     | Caveolae-associated protein 4                              | 2705650                 | 5613971          | 2.07       |
| O14791     | Apolipoprotein L1                                          | 39149219                | 80485446         | 2.06       |
| O95445     | Apolipoprotein M                                           | 36433626                | 74924971         | 2.06       |

| Protein-ID | Protein Name                                                | Intensity<br>AMI | Intensity<br>AAD | AAD vs CAD |
|------------|-------------------------------------------------------------|------------------|------------------|------------|
| P02765     | Alpha-2-HS-glycoprotein                                     | 6.93E+08         | 1.41E+09         | 2.04       |
| P10643     | Complement component C7                                     | 62713832         | 1.27E+08         | 2.03       |
| A0A0B4J1X5 | Immunoglobulin heavy variable 3-74                          | 596594.1         | 1212717          | 2.03       |
| P0DOX5     | Immunoglobulin gamma-1 heavy chain                          | 7.68E+08         | 1.55E+09         | 2.01       |
| P00748     | Coagulation factor XII                                      | 68560941         | 1.37E+08         | 2.01       |
| P53999     | Activated RNA polymerase II transcriptional coactivator p15 | 264494.1         | 131871.9         | -2.01      |
| P0C0S8     | Histone H2A type 1                                          | 1630629          | 805315.8         | -2.02      |
| P25786     | Proteasome subunit alpha type-1                             | 317883.4         | 156975.9         | -2.03      |
| P68431     | Histone H3.1                                                | 8952716          | 4387615          | -2.04      |
| A0A087WSX0 | Immunoglobulin lambda variable 5-45                         | 2274002          | 1110598          | -2.05      |
| P00338     | L-lactate dehydrogenase A chain                             | 2031686          | 987038.6         | -2.06      |
| P00746     | Complement factor D                                         | 1282935          | 624018.7         | -2.06      |
| P32969     | 60S ribosomal protein L9                                    | 216442.1         | 103612.8         | -2.09      |
| P47756     | F-actin-capping protein subunit beta                        | 1059434          | 497245.9         | -2.13      |
| P62906     | 60S ribosomal protein L10a                                  | 1154523          | 530857.8         | -2.17      |
| P05089     | Arginase-1                                                  | 389594.1         | 178641.6         | -2.18      |
| P31151     | Protein S100-A7                                             | 986671           | 445807.3         | -2.21      |
| P04211     | Immunoglobulin lambda variable 7-43                         | 1589517          | 666360.8         | -2.39      |
| P02750     | Leucine-rich alpha-2-glycoprotein                           | 3.95E+08         | 1.6E+08          | -2.46      |
| P0DOX8     | Immunoglobulin lambda-1 light chain                         | 2.43E+09         | 9.64E+08         | -2.52      |
| P20618     | Proteasome subunit beta type-1                              | 371606.1         | 147211.9         | -2.52      |
| P35268     | 60S ribosomal protein L22                                   | 738555.5         | 290938.6         | -2.54      |
| P49247     | Ribose-5-phosphate isomerase                                | 139728.2         | 54382.17         | -2.57      |
| O00299     | Chloride intracellular channel protein 1                    | 15768595         | 5909216          | -2.67      |
| P01614     | Immunoglobulin kappa variable 2D-40                         | 5132799          | 1895354          | -2.71      |
| P12429     | Annexin A3                                                  | 419189.5         | 153768.9         | -2.73      |
| O60814     | Histone H2B type 1-K                                        | 3812394          | 1370795          | -2.78      |
| A0A075B6I0 | Immunoglobulin lambda variable 8-61                         | 25827886         | 8879334          | -2.91      |
| P61247     | 40S ribosomal protein S3a                                   | 787941.7         | 269652           | -2.92      |
| Q14019     | Coactosin-like protein                                      | 417889.8         | 141684.9         | -2.95      |
| P23284     | Peptidyl-prolyl cis-trans isomerase B                       | 1332566          | 449064           | -2.97      |
| P42766     | 60S ribosomal protein L35                                   | 610791.7         | 205959.1         | -2.97      |
| P62701     | 40S ribosomal protein S4, X isoform                         | 1315116          | 435110.3         | -3.02      |
| P27348     | 14-3-3 protein theta                                        | 1591228          | 507515.9         | -3.14      |
| P27105     | Erythrocyte band 7 integral membrane protein                | 2665236          | 834476.5         | -3.19      |
| P61224     | Ras-related protein Rap-1b                                  | 2540939          | 775637.7         | -3.28      |
| P04179     | Superoxide dismutase [Mn], mitochondrial                    | 973299.9         | 295180.8         | -3.3       |
| P02679     | Fibrinogen gamma chain                                      | 1.52E+10         | 4.39E+09         | -3.47      |
| P02675     | Fibrinogen beta chain                                       | 1.59E+10         | 4.41E+09         | -3.61      |
| P61353     | 60S ribosomal protein L27                                   | 694210.4         | 191914.9         | -3.62      |
| P18428     | Lipopolysaccharide-binding protein                          | 4010985          | 1103103          | -3.64      |
| P05451     | Lithostathine-1-alpha                                       | 661492.6         | 178063.3         | -3.71      |
| P61769     | Beta-2-microglobulin                                        | 7099637          | 1910219          | -3.72      |
| Q86UD1     | Out at first protein homolog                                | 419531.1         | 108268.1         | -3.87      |
| Q02543     | 60S ribosomal protein L18a                                  | 631806.8         | 157630           | -4.01      |
| Q15828     | Cystatin-M                                                  | 1100160          | 245431.8         | -4.48      |
| P02671     | Fibrinogen alpha chain                                      | 1.64E+10         | 3.4E+09          | -4.84      |
| P06310     | Immunoglobulin kappa variable 2-30                          | 1701506          | 346056.3         | -4.92      |
| A0A075B6S6 | Immunoglobulin kappa variable 2D-30                         | 3288637          | 654678.6         | -5.02      |
| P59665     | Neutrophil defensin 1                                       | 3279206          | 639860.4         | -5.12      |
| P08779     | Keratin, type I cytoskeletal 16                             | 7723039          | 1227207          | -6.29      |
| P29508     | Serpin B3                                                   | 1601955          | 254138           | -6.3       |
| P07477     | Trypsin-1                                                   | 1445146          | 225201.7         | -6.42      |
| Q04695     | Keratin, type I cytoskeletal 17                             | 1421981          | 188254           | -7.55      |
| P62241     | 40S ribosomal protein S8                                    | 654473.2         | 72339.52         | -9.05      |
| P01706     | Immunoglobulin lambda variable 2-11                         | 13413550         | 1233640          | -10.87     |
| P48668     | Keratin, type II cytoskeletal 6C                            | 7739265          | 644258.5         | -12.01     |
| P20742     | Pregnancy zone protein                                      | 57507538         | 3916361          | -14.68     |

| Protein-ID | Protein Name                               | Intensity<br>AMI | Intensity<br>AAD | AAD vs CAD |
|------------|--------------------------------------------|------------------|------------------|------------|
| P08294     | Extracellular superoxide dismutase [Cu-Zn] | 3983527          | 172166           | -23.14     |
| P02741     | C-reactive protein                         | 8.98E+08         | 35469096         | -25.31     |
| Q08830     | Fibrinogen-like protein 1                  | 3059643          | 83160.23         | -36.79     |
| P0DJI8     | Serum amyloid A-1 protein                  | 4932068          | 29883.9          | -165.04    |
